# Supplementary material
Source: PubMed Central journal article supplement (PMC10019085)
Supplement: NIHMS1877916-supplement-supinfo.pdf [file NIHMS1877916-supplement-supinfo.pdf]

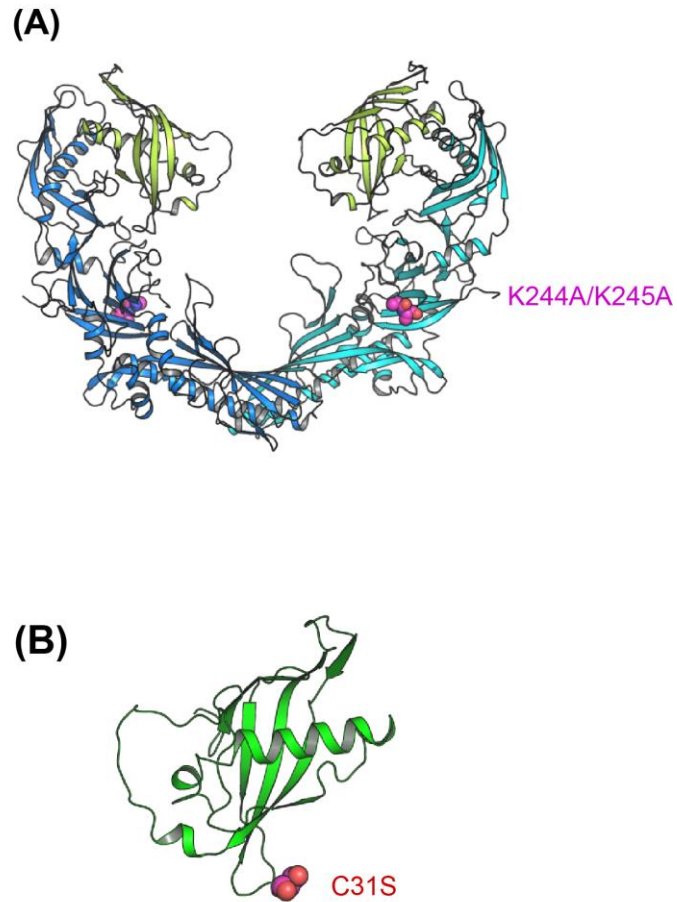

**Figure S1. The locations of the K244A/K245A mutations on the OrfX1–OrfX3 complex and the C31S mutation on OrfX1. (A)** Crystal structure of the OrfX1–OrfX3 tetrameric complex with K244A/K245A mutations in OrfX3 shown as sphere representations. These two residues are located on the OrfX3 surface, which are not involved in OrfX3 dimerization nor its interaction with OrfX1. **(B)** The structure of OrfX1 with C31S mutation shown as a sphere representation.

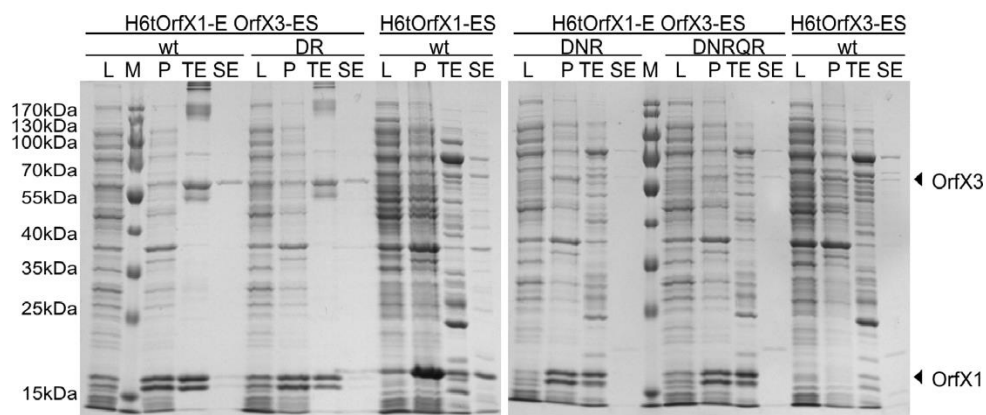

**Figure S2. Validation of interactions between OrfX1 and OrfX3 in the OrfX1–OrfX3 complex.**

Co-expression analysis of the WT H6tOrfX1-ES, WT H6tOrfX3-ES, H6tOrfX1-OrfX3-ES WT complex and the respective OrfX3 mutants D152R/R162A (DR), D57A/N60A/R62A (DNR), D57A/N60A/R62A/Q93A/R162A (DNRQR). Protein load of WT and DR eluates (TE, SE) were 10-fold reduced to account for the high protein expression. L, clear lysate; P, cell pellet after lysis; TE, eluate from Co<sup>2+</sup>-Talon matrix; SE, eluate from StrepTactin matrix. Samples were analyzed by SDS-PAGE analysis and Coomassie stain.

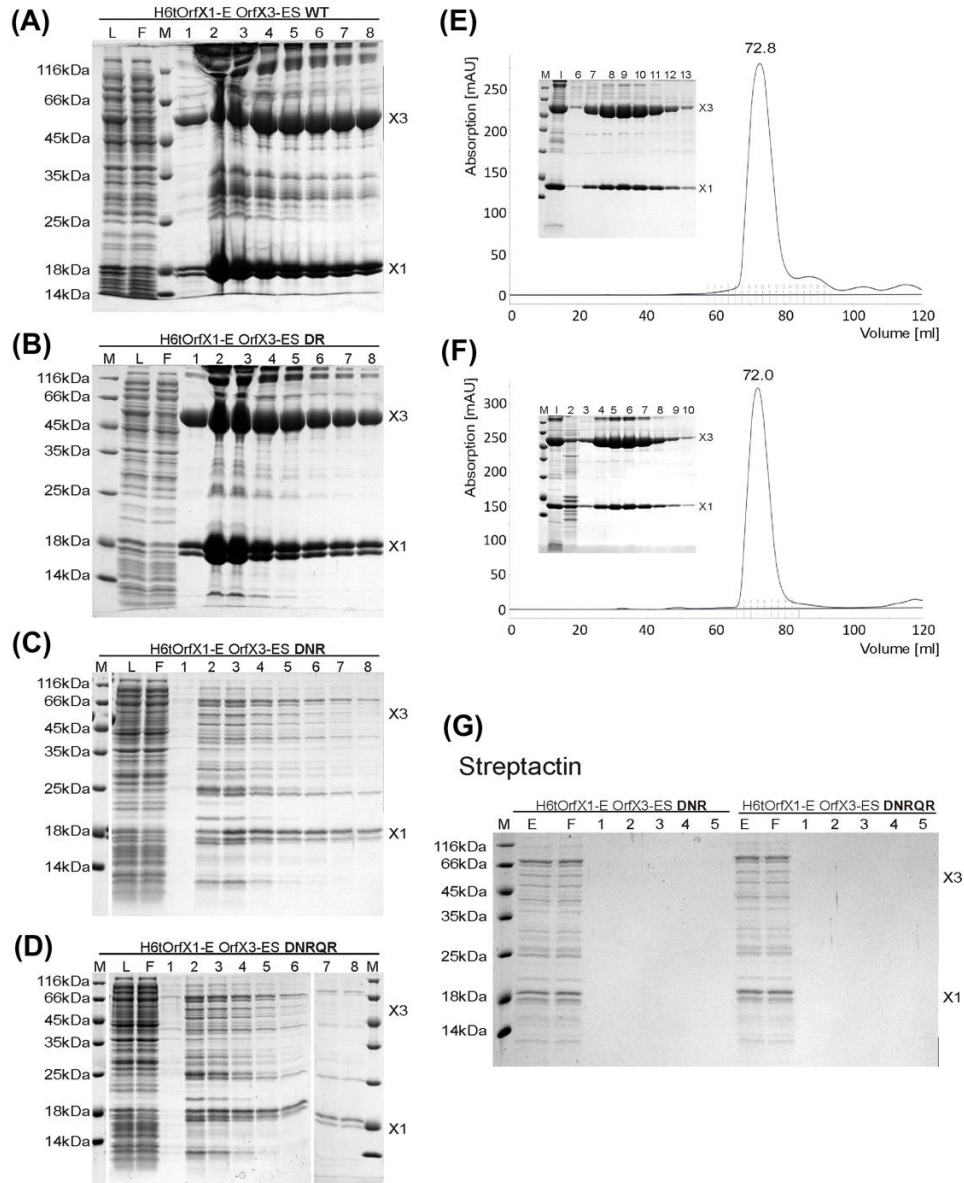

**Figure S3. Validation of interactions between OrfX1 and OrfX3 in the OrfX1-OrfX3 complex.** Immobilized metal affinity chromatography (IMAC) purification of the H6tOrfX1-OrfX3-ES WT complex (A) and the respective OrfX3 mutants D152R/R162A (DR) (B), D57A/N60A/R62A (DNR) (C), D57A/N60A/R62A/Q93A/R162A (DNRQR) (D). L, clear lysate; F, flow through; the numbers indicate fractions eluted from Co<sup>2+</sup>-Talon matrix. (E-F) The pooled IMAC fractions of the WT and the DR mutants were treated with thrombin to remove the His tag and further subjected to size-exclusion chromatography (Superdex-200 16/60PG). Please note the His-tagged OrfX1 shows as double bands on SDS-PAGE, but a single band after His tag removal. (G) The pooled IMAC fractions of the DNR and DNRQR mutants were subjected to StrepTactin binding targeting the Strep-tagged OrfX3, which did not yield detectable OrfX3 or the OrfX1-OrfX3 complex. E, eluate from Co<sup>2+</sup>-Talon matrix; F, flow through; the numbers indicate eluate from StrepTactin matrix. All samples were analyzed by SDS-PAGE and Coomassie stain.

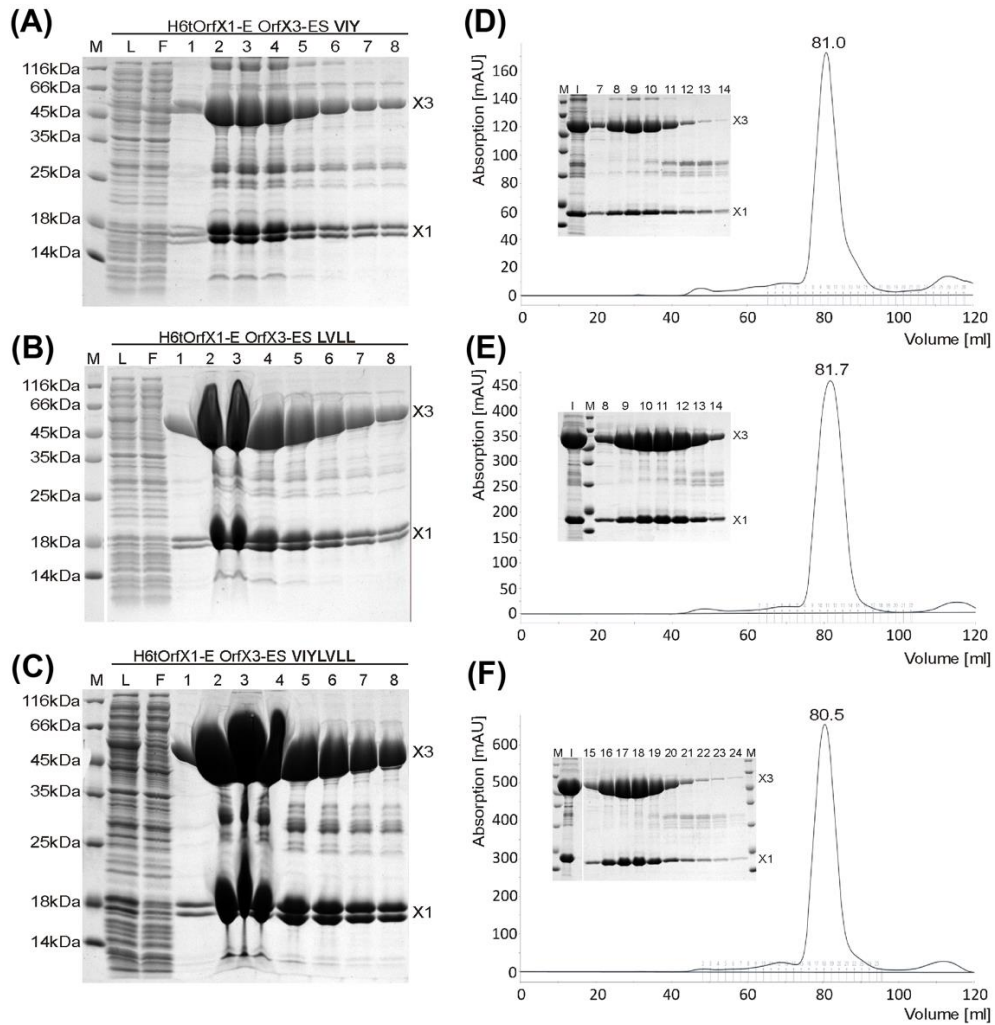

**Figure S4. Validation of interactions between the homodimeric OrfX3 in the OrfX1–OrfX3 complex.** (A–C) IMAC purification of the respective H6tOrfX1-OrfX3-ES complex mutants V377E/I379E/Y381S (VIY), L390E/V394D/L401E/L405E (LVLL), and (VIY/LVLL); L, clear lysate; F, flow through, the numbers indicate fractions eluted from Co<sup>2+</sup>-Talon matrix. All samples were analyzed by SDS-PAGE and Coomassie stain. (D–F) The pooled IMAC fractions of the three mutants were treated with thrombin to remove the His tag and further subjected to size-exclusion chromatography (Superdex-200 16/60PG).

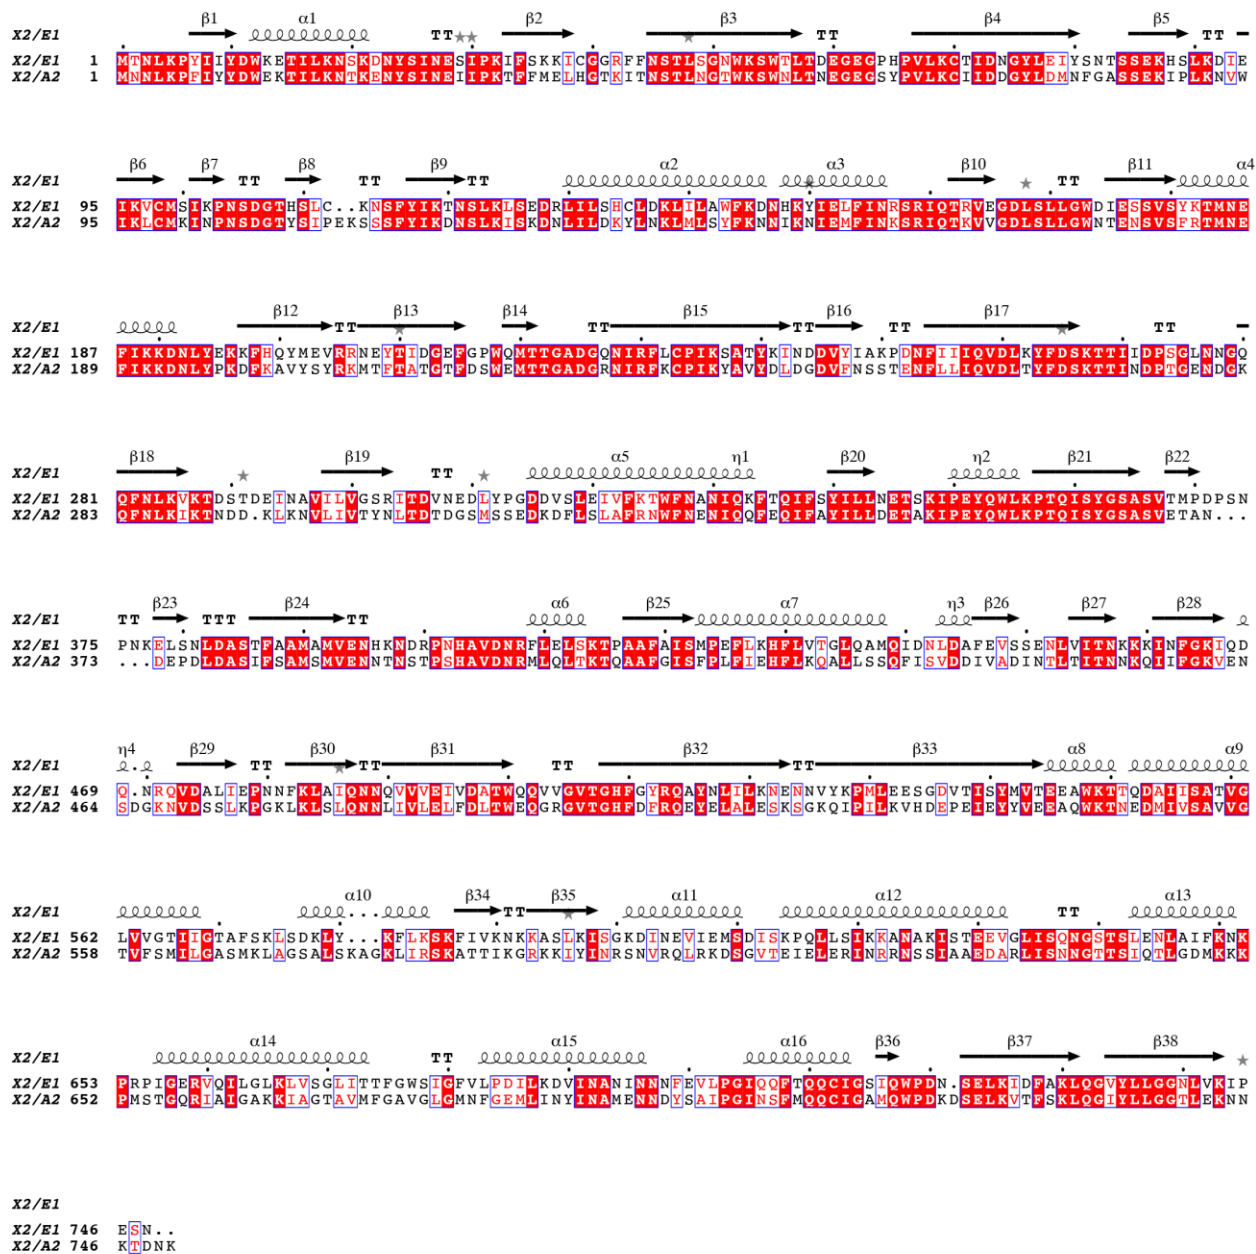

Figure S5. Sequence alignment between BoNT/E1 OrfX2 and BoNT/A2 OrfX2.

**Table S1. Data collection and refinement statistics.**

|                                                         | SeMet-OrfX1-<br>OrfX3<br>(K244A/K245A)                | OrfX1-OrfX3<br>(K244A/K245A)<br>PDB: 8FBD             | SeMet-OrfX1-<br>C31S<br>PDB: 8FBE | SeMet-OrfX2<br>PDB: 8FBF  |
|---------------------------------------------------------|-------------------------------------------------------|-------------------------------------------------------|-----------------------------------|---------------------------|
| <b>Data collection</b>                                  |                                                       |                                                       |                                   |                           |
| Wavelength (Å)                                          | 0.97918                                               | 0.97918                                               | 0.97918                           | 0.9795                    |
| Resolution (Å)                                          | 173.01-2.35<br>(2.40-2.35)                            | 141.28-2.05<br>(2.09-2.05)                            | 49.02-1.73<br>(1.76-1.73)         | 65.05-1.85<br>(1.92-1.85) |
| Space group                                             | <i>P</i> 2 <sub>1</sub> 2 <sub>1</sub> 2 <sub>1</sub> | <i>P</i> 2 <sub>1</sub> 2 <sub>1</sub> 2 <sub>1</sub> | <i>P</i> 3 <sub>2</sub>           | <i>P</i> 2 <sub>1</sub>   |
| Cell dimensions                                         |                                                       |                                                       |                                   |                           |
| <i>a</i> , <i>b</i> , <i>c</i> (Å)                      | 39.2, 173.0,<br>242.8                                 | 39.3, 174.0,<br>242.0                                 | 56.6, 56.6,<br>84.3               | 106.3, 83.2,<br>108.4     |
| $\alpha$ , $\beta$ , $\gamma$ (°)                       | 90, 90, 90                                            | 90, 90, 90                                            | 90, 90, 120                       | 90, 105.8, 90             |
| Completeness (%)                                        | 99.9 (99.8)                                           | 99.2 (95.4)                                           | 99.8 (100.0)                      | 99.8 (99.5)               |
| Redundancy                                              | 3.7 (3.7)                                             | 4.7 (4.5)                                             | 3.5 (3.5)                         | 6.7 (6.2)                 |
| <i>R</i> <sub>merge</sub> (%)                           | 14.0 (136.2)                                          | 8.9 (77.8)                                            | 5.3 (77.8)                        | 14.7 (75.8)               |
| <i>R</i> <sub>pim</sub> (%)                             | 8.2 (80.1)                                            | 6.5 (61.7)                                            | 3.4 (49.7)                        | 6.2 (31.8)                |
| Mean <i>I</i> / $\sigma$ ( <i>I</i> )                   | 12.0 (1.5)                                            | 11.1 (1.6)                                            | 17.3 (1.8)                        | 22.2 (2.3)                |
| <i>CC</i> <sub>1/2</sub>                                | 0.996 (0.543)                                         | 0.994 (0.545)                                         | 0.999 (0.555)                     | 0.966 (0.892)             |
| <b>Refinement</b>                                       |                                                       |                                                       |                                   |                           |
| Resolution (Å)                                          |                                                       | 49.67-2.05                                            | 19.94-1.73                        | 19.89-1.85                |
| No. reflections                                         |                                                       | 104, 662                                              | 31, 471                           | 154, 831                  |
| <i>R</i> <sub>work</sub> / <i>R</i> <sub>free</sub> (%) |                                                       | 17.99/21.90                                           | 17.21/21.65                       | 19.12/23.95               |
| No. atoms                                               |                                                       |                                                       |                                   |                           |
| Protein                                                 |                                                       | 9, 958                                                | 2, 379                            | 11, 855                   |
| Ligand/ion                                              |                                                       | 8                                                     | 0                                 | 20                        |
| Water                                                   |                                                       | 572                                                   | 238                               | 848                       |
| B-factors (Å <sup>2</sup> )                             |                                                       |                                                       |                                   |                           |
| Protein                                                 |                                                       | 48.4                                                  | 35.2                              | 35.2                      |
| Ligand/ion                                              |                                                       | 45.5                                                  | -                                 | 48.6                      |
| Water                                                   |                                                       | 46.7                                                  | 42.1                              | 39.1                      |
| r.m.s. deviations                                       |                                                       |                                                       |                                   |                           |
| Bond lengths (Å)                                        |                                                       | 0.008                                                 | 0.007                             | 0.006                     |
| Bond angles (°)                                         |                                                       | 1.073                                                 | 1.080                             | 1.008                     |

Values in parentheses are for the highest resolution shell.

**Table S2. Interacting residues at the OrfX1–OrfX3 heterodimer interface.**

| Interacting residues at the OrfX1–OrfX3 heterodimer interface |          |                   |          |                   |
|---------------------------------------------------------------|----------|-------------------|----------|-------------------|
| Type of interaction                                           | Chain ID | Residues in OrfX1 | Chain ID | Residues in OrfX3 |
| Salt Bridge                                                   | A, C     | D58               | B, D     | R78               |
| Salt Bridge                                                   | A, C     | E108              | B, D     | R162              |
| Salt Bridge                                                   | A, C     | E122              | B, D     | R162              |
| H-bond                                                        | A        | N14               | B        | E151              |
| H-bond                                                        | C        | N14               | D        | D152              |
| H-bond                                                        | A, C     | N30               | B, D     | Q233              |
| H-bond                                                        | A, C     | C31               | B, D     | S59               |
| H-bond                                                        | A, C     | S32               | B, D     | D57               |
| H-bond                                                        | A, C     | N34               | B, D     | D57               |
| H-bond                                                        | A, C     | Y35               | B, D     | G55               |
| H-bond                                                        | A, C     | Y37               | B, D     | N60               |
| H-bond                                                        | A        | K52               | B        | Y147              |
| H-bond                                                        | A, C     | N102              | B, D     | G55               |
| H-bond *                                                      | A, C     | N102              | B, D     | R62               |
| H-bond                                                        | A, C     | Y104              | B, D     | N60               |
| H-bond                                                        | A, C     | Y104              | B, D     | Q93               |
| H-bond                                                        | A, C     | N107              | B, D     | P124              |
| H-bond                                                        | A, C     | N126              | B, D     | S133              |
| Hydrophobic                                                   | A, C     | I119              | B, D     | Y40, Y159, L163   |
| Hydrophobic                                                   | A, C     | L120, V123, I124  | B, D     | F155              |
| Cation-pi                                                     | A, C     | Y104              | B, D     | R62               |
| Van der Waals                                                 | A, C     | N30               | B, D     | Q235              |
| Van der Waals                                                 | A, C     | P33               | B, D     | Q234, Q235, K236  |
| Van der Waals                                                 | A, C     | V105              | B, D     | I130              |
| Van der Waals                                                 | A, C     | I106              | B, D     | P124, E125        |
| Van der Waals                                                 | A, C     | K116, N117, G118  | B, D     | Y40               |
| Van der Waals                                                 | A, C     | L120              | B, D     | F155              |
| Van der Waals                                                 | A, C     | L130              | B, D     | S133              |

\* indicates a water-mediated H-bond.

**Table S3. Interacting residues at the OrfX3 homodimer interface in the OrfX1–OrfX3 complex.**

| Interacting residues at the OrfX3 homodimer interface in the OrfX1–OrfX3 complex |          |                          |          |                                 |
|----------------------------------------------------------------------------------|----------|--------------------------|----------|---------------------------------|
| Type of interaction                                                              | Chain ID | Residues OrfX3           | Chain ID | Residues in OrfX3'              |
| H-bond                                                                           | B        | S375                     | D        | N387                            |
| H-bond                                                                           | B, D     | N378                     | D, B     | S382                            |
| H-bond                                                                           | B, D     | Q380                     | D, B     | Q380                            |
| H-bond                                                                           | B, D     | S382                     | D, B     | N378                            |
| Van der Waals                                                                    | B, D     | V377, I379               | D, B     | E383, Y381                      |
| Hydrophobic                                                                      | B, D     | S398, L401, S402<br>L405 | D, B     | L390, V393, V394,<br>L397, S398 |
